# Supplementary material for: Anti-CotH3 antibodies protect mice from mucormycosis by prevention of invasion and augmenting opsonophagocytosis
Source: PubMed Central journal article supplement — Sci Adv. 2019 Jun 12;5(6):eaaw1327. doi: 10.1126/sciadv.aaw1327 (PMC6561750; doi:10.1126/sciadv.aaw1327), 2019-06-12
Supplement: aaw1327_SM.pdf [file aaw1327_SM.pdf]

## Supplementary Materials for

### **Anti-CotH3 antibodies protect mice from mucormycosis by prevention of invasion and augmenting opsonophagocytosis**

Teclegiorgis Gebremariam, Sondus Alkhazraji, Sameh S. M. Soliman, Yiyu Gu, Heewon H. Jeon, Lina Zhang, Samuel W. French, David A. Stevens, John E. Edwards Jr., Scott G. Filler, Priya Uppuluri, Ashraf S. Ibrahim\*

\*Corresponding author. Email: [ibrahim@labiomed.org](mailto:ibrahim@labiomed.org)

Published 12 June 2019, *Sci. Adv.* **5**, eaaw1327 (2019)  
DOI: 10.1126/sciadv.aaw1327

#### **This PDF file includes:**

- Table S1. The *R. delemar* MGQTNDGAYRDPTDNN peptide is highly conserved among CotH proteins from other Mucorales.
- Fig. S1. Effect of anti-CotH3 antibodies on the metabolic activity and germination of *R. delemar*.
- Fig. S2. Anti-CotH3 antibodies enhance murine macrophage killing of *R. delemar* ex vivo through maturation of the phagolysosome.
- Fig. S3. Induction of neutropenia in DKA mice by treatment with anti-Ly6G antibody.
- Fig. S4. Screening for protective monoclonal anti-CotH3 antibodies using <sup>51</sup>Cr-release assay.
- Fig. S5. Recognition of native and recombinant *R. delemar* CotH3 protein by monoclonal anti-CotH3 antibody.
- Fig. S6. Percent binding (relative to negative control without antibodies) of monoclonal C2 and polyclonal anti-CotH3 antibodies to different Mucorales.

## Supplementary Materials

**Table S1. The *R. delemar* MGQTNDGAYRDPTDNN peptide is highly conserved among Coth proteins from other Mucorales.**

| <b>Mucorales</b>                    | <b>% Amino acid identity</b> |
|-------------------------------------|------------------------------|
| <i>Rhizopus oryzae</i>              | 100                          |
| <i>Rhizopus microsporus</i>         | 100                          |
| <i>Mucor circinelloides</i>         | 100                          |
| <i>Lichtheimia corymbifera</i>      | 92                           |
| <i>Rhizomucor variabilis</i>        | 82                           |
| <i>Mortierella alpina</i>           | 79                           |
| <i>Syncephalastrum racemosum</i>    | 79                           |
| <i>Mucor racemosus</i>              | 78                           |
| <i>Saksenaea elongisporus</i>       | 78                           |
| <i>Cunninghamella bertholletiae</i> | 73                           |
| <i>Saksenaea vasiformis</i>         | 73                           |
| <i>Apophysomyces elegans</i>        | 71                           |
| <i>Apophysomyces trapeziformis</i>  | 71                           |

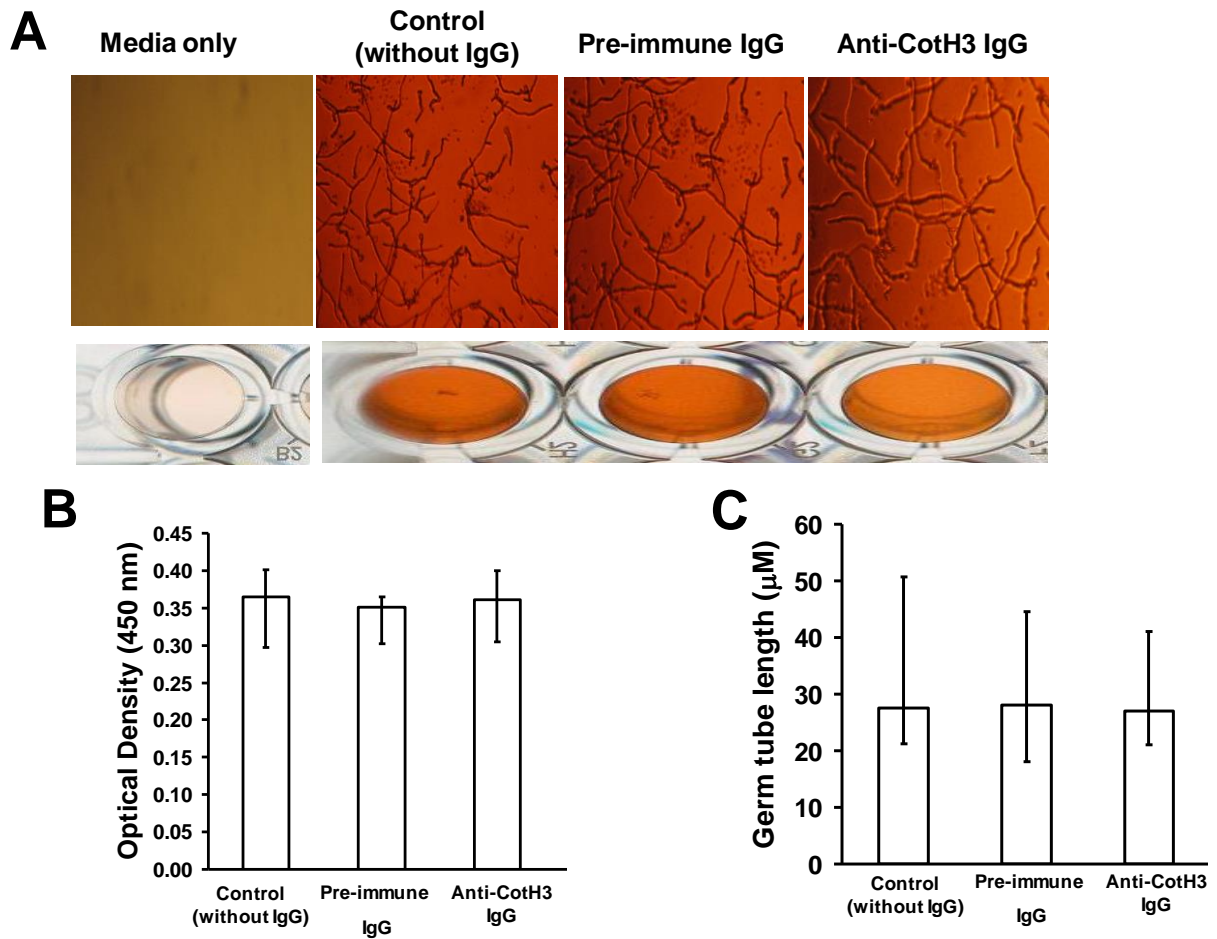

**Fig. S1. Effect of anti-CotH3 antibodies on the metabolic activity and germination of *R. delemar*.** Effect of anti-CotH3 antibodies (purified IgG at 100 µg/ml) on the metabolic activities (**A, B**) and germination (**C**) of *R. delemar* 99-880. Metabolic activity of the fungus was measured by XTT assay.

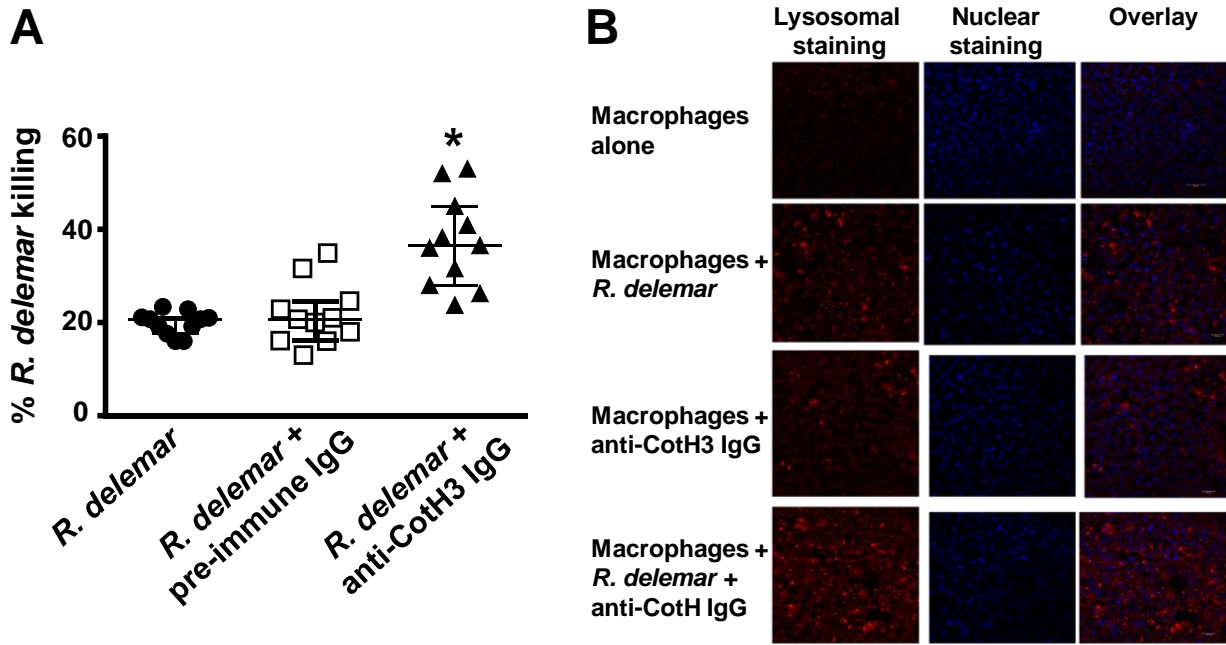

**Fig. S2. Anti-CotH3 antibodies enhance murine macrophage killing of *R. delemar* ex vivo through maturation of the phagolysosome.** Anti-CotH3 antibodies (purified IgG) enhance murine macrophage killing of *R. delemar* ex vivo (**A**) through maturation of the phagolysosome (**B**).

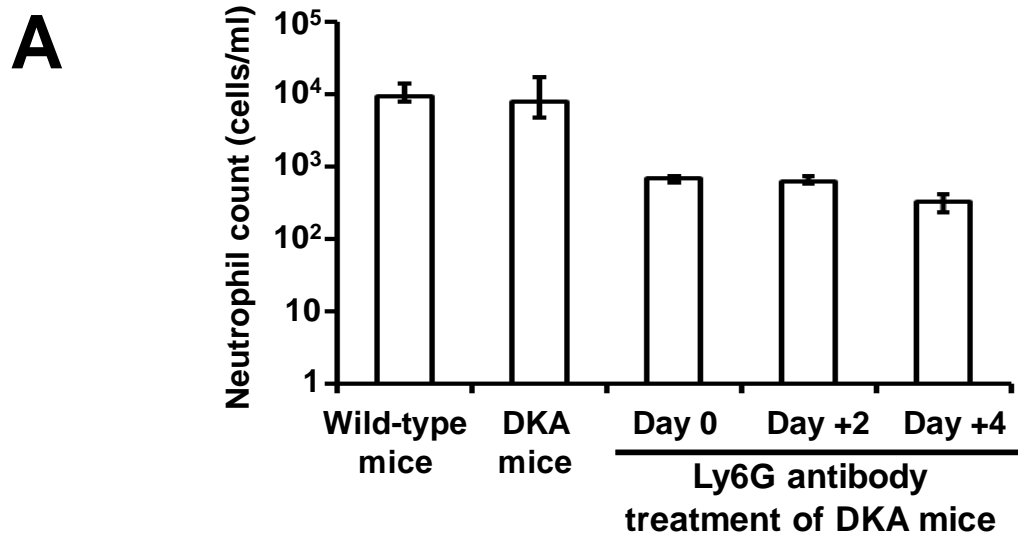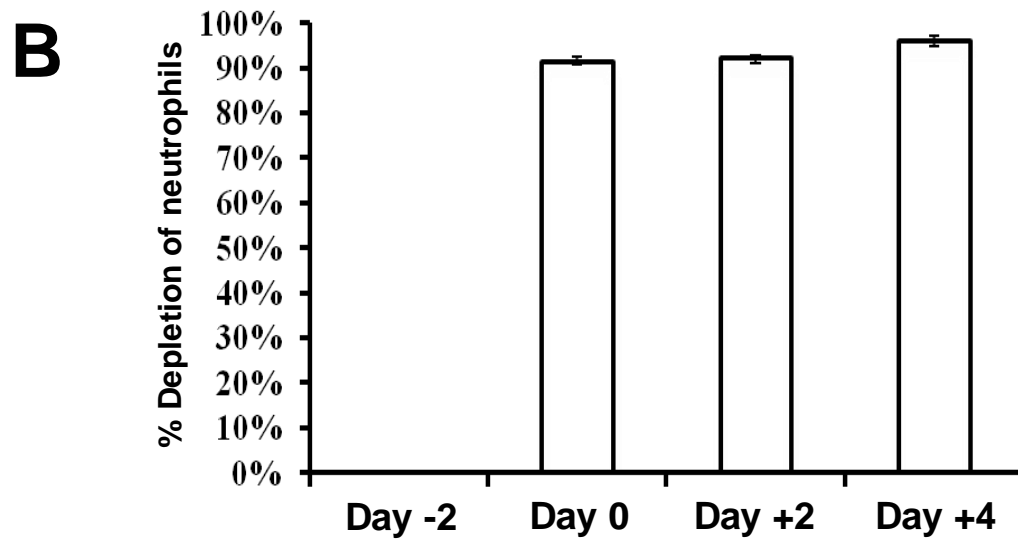

**Fig. S3. Induction of neutropenia in DKA mice by treatment with anti-Ly6G antibody.**

Treatment of DKA mice with anti-Ly6G antibody results in >90% reduction in circulating neutrophils for at least 4 to 6 days post infection with *R. delemar* (A and B).

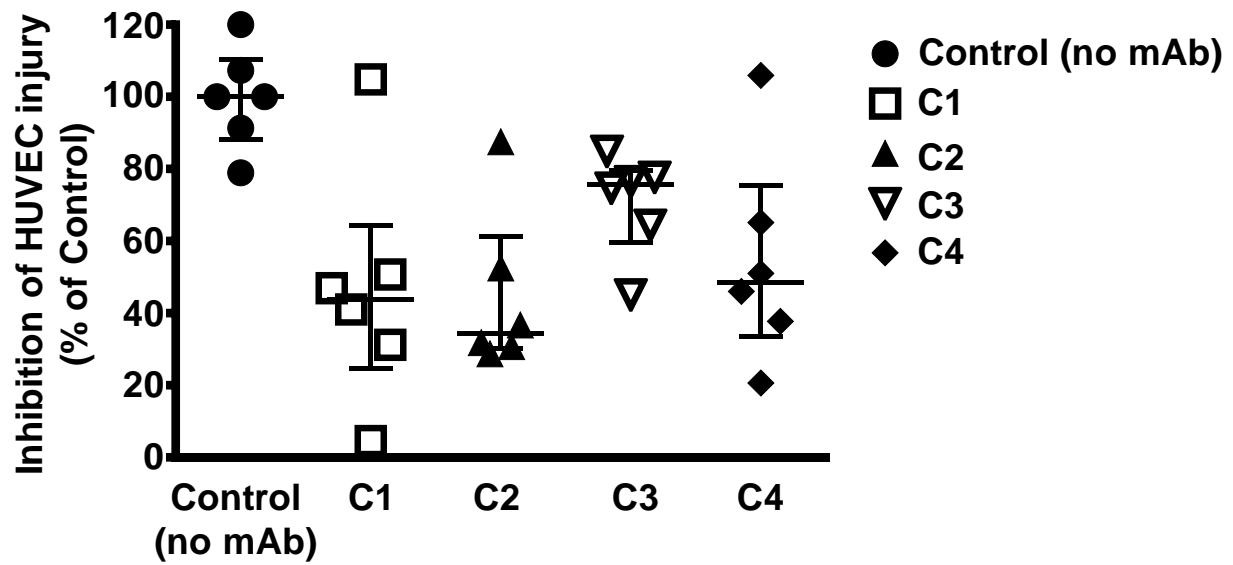

Fig. S4. Screening for protective monoclonal anti-Coth3 antibodies using  $^{51}\text{Cr}$ -release assay.

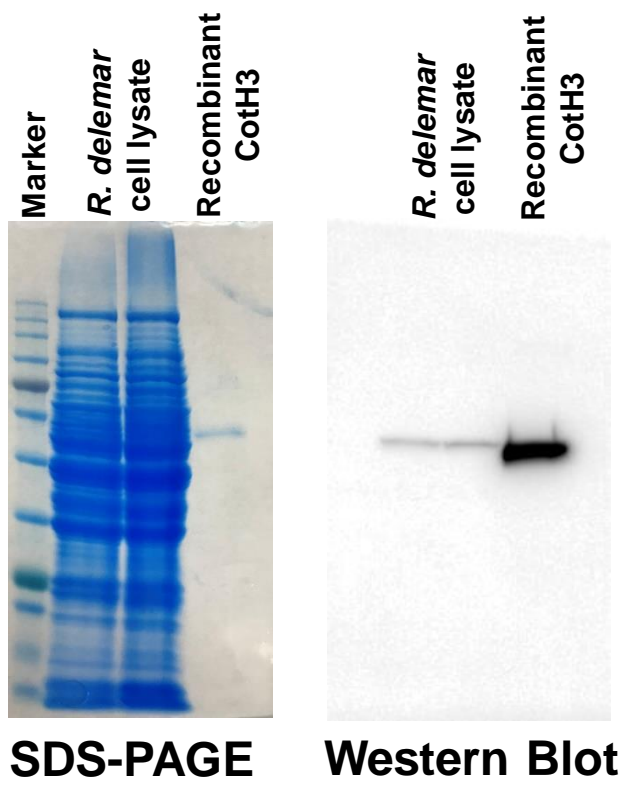

Fig. S5. Recognition of native and recombinant *R. delemar* CotH3 protein by monoclonal anti-CotH3 antibody.

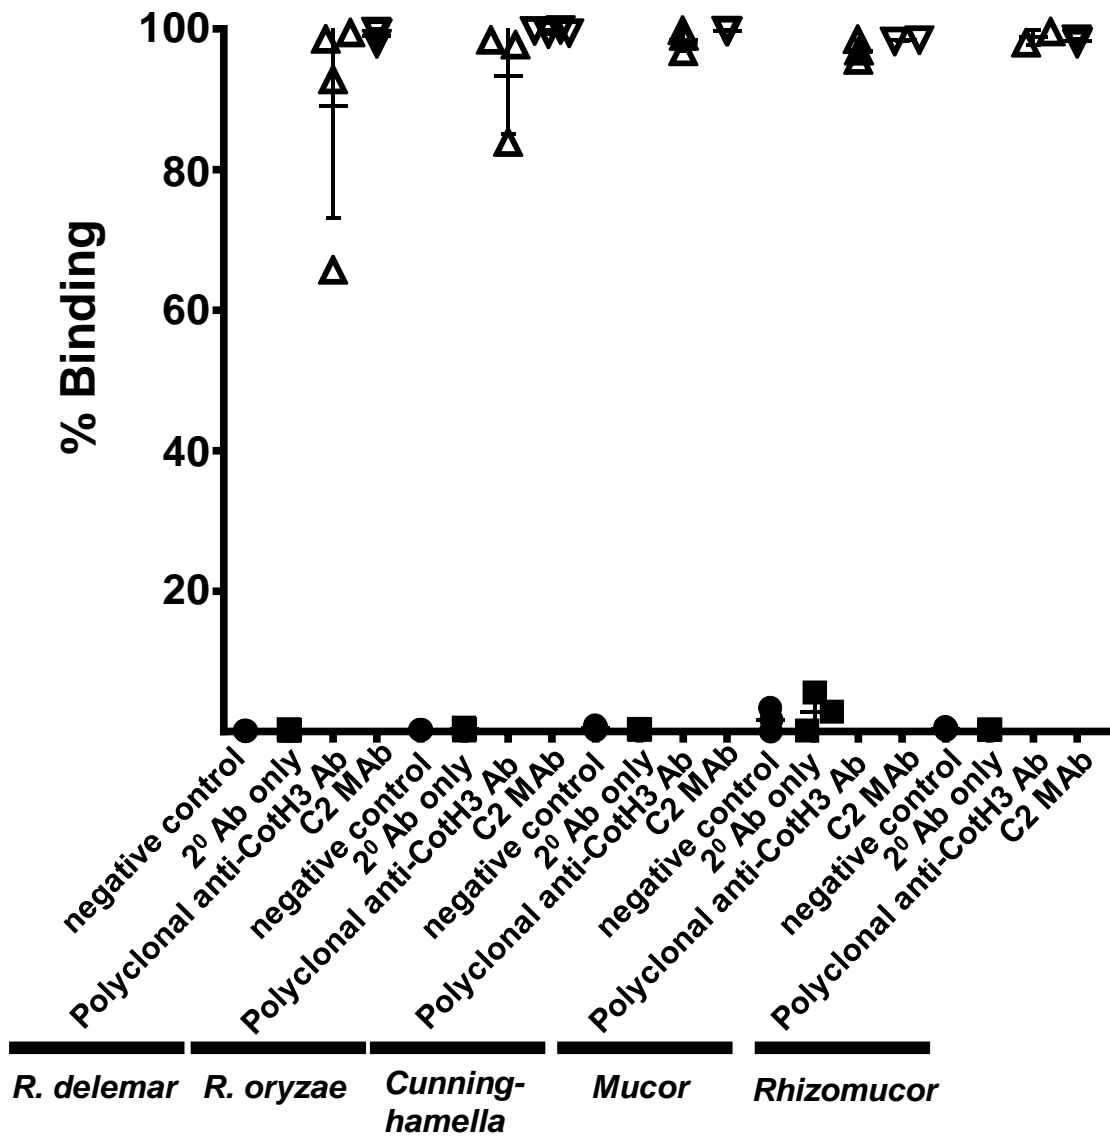

Fig. S6. Percent binding (relative to negative control without antibodies) of monoclonal C2 and polyclonal anti-CotH3 antibodies to different Mucorales.
